# Supplementary material for: Effectiveness of an Educational Filmmaking Project in Promoting the Psychological Well-Being of Adolescents with Emotive/Behavioural Problems
Source: MDPI journal article supplement (doi:10.3390/healthcare11121695), 2023-06-09
Supplement: s1 [file s1]

## **Supplementary Material**

Supplementary File S1: All scales we used for testing our sample are reported in this supplementary section.

1. Rosenberg Self Esteem Scale (RSE);
2. Youth Self-Report scale (YSR);
3. Social Responsiveness Scale (SRS);
4. Revised Conners' Parent Rating Scale (CPRS-R).

# ***Rosenberg Self-Esteem Scale***

## ***Scala dell'autostima di Rosenberg***

(Copyright: Rosenberg, 1965)

(Versione Italiana: Prezza, Trombaccia, Armento, 1994)

---

### **1) Penso di valere almeno quanto gli altri**

|                      |           |               |                          |
|----------------------|-----------|---------------|--------------------------|
| Fortemente d'accordo | D'accordo | In disaccordo | Fortemente in disaccordo |
| <b>3</b>             | <b>2</b>  | <b>1</b>      | <b>0</b>                 |

### **2) Penso di avere un certo numero di qualità**

|                      |           |               |                          |
|----------------------|-----------|---------------|--------------------------|
| Fortemente d'accordo | D'accordo | In disaccordo | Fortemente in disaccordo |
| <b>3</b>             | <b>2</b>  | <b>1</b>      | <b>0</b>                 |

### **3) Sono portato a pensare di essere un vero fallimento**

|                      |           |               |                          |
|----------------------|-----------|---------------|--------------------------|
| Fortemente d'accordo | D'accordo | In disaccordo | Fortemente in disaccordo |
| <b>0</b>             | <b>1</b>  | <b>2</b>      | <b>3</b>                 |

### **4) Sono in grado di fare le cose bene almeno come la maggior parte delle persone**

|                      |           |               |                          |
|----------------------|-----------|---------------|--------------------------|
| Fortemente d'accordo | D'accordo | In disaccordo | Fortemente in disaccordo |
| <b>3</b>             | <b>2</b>  | <b>1</b>      | <b>0</b>                 |

### **5) Penso di non avere molto di cui essere fiero**

|                      |           |               |                          |
|----------------------|-----------|---------------|--------------------------|
| Fortemente d'accordo | D'accordo | In disaccordo | Fortemente in disaccordo |
| <b>0</b>             | <b>1</b>  | <b>2</b>      | <b>3</b>                 |

### **6) Ho un atteggiamento positivo verso me stesso**

|                      |           |               |                          |
|----------------------|-----------|---------------|--------------------------|
| Fortemente d'accordo | D'accordo | In disaccordo | Fortemente in disaccordo |
| <b>3</b>             | <b>2</b>  | <b>1</b>      | <b>0</b>                 |

**7) Complessivamente sono soddisfatto di me stesso**

|                      |           |               |                          |
|----------------------|-----------|---------------|--------------------------|
| Fortemente d'accordo | D'accordo | In disaccordo | Fortemente in disaccordo |
| <b>3</b>             | <b>2</b>  | <b>1</b>      | <b>0</b>                 |

**8) Desidererei aver maggior rispetto di me stesso**

|                      |           |               |                          |
|----------------------|-----------|---------------|--------------------------|
| Fortemente d'accordo | D'accordo | In disaccordo | Fortemente in disaccordo |
| <b>0</b>             | <b>1</b>  | <b>2</b>      | <b>3</b>                 |

**9) Senza dubbio a volte mi sento inutile**

|                      |           |               |                          |
|----------------------|-----------|---------------|--------------------------|
| Fortemente d'accordo | D'accordo | In disaccordo | Fortemente in disaccordo |
| <b>0</b>             | <b>1</b>  | <b>2</b>      | <b>3</b>                 |

**10) A volte penso di essere un buono a nulla**

|                      |           |               |                          |
|----------------------|-----------|---------------|--------------------------|
| Fortemente d'accordo | D'accordo | In disaccordo | Fortemente in disaccordo |
| <b>0</b>             | <b>1</b>  | <b>2</b>      | <b>3</b>                 |

***Scala dell'autostima di Rosenberg - Risultati***

|            |               |           |
|------------|---------------|-----------|
| Nome _____ | Cognome _____ | Età _____ |
| _____      |               |           |

|             |                  |                 |
|-------------|------------------|-----------------|
| Rater _____ | Data esame _____ | N: ____ / _____ |
|-------------|------------------|-----------------|

**Punteggio Totale** \_\_\_\_\_

La scala va da 0 a 30. I punteggi tra 15 e 25 sono nel range di normalità; punteggi inferiori a 15 indicano una bassa autostima.

# QUESTIONARIO SUL COMPORTAMENTO DEL GIOVANE -Anni 11-18

## Youth Self Report for Ages 11-18 di Thomas M. Achenbach -2001 .

Per favore compila

|                                                                        |             |                                                        |                                                                                                                                                                                                                                                                                                                      |
|------------------------------------------------------------------------|-------------|--------------------------------------------------------|----------------------------------------------------------------------------------------------------------------------------------------------------------------------------------------------------------------------------------------------------------------------------------------------------------------------|
| INDICA IL TUO NOME E COGNOME                                           |             |                                                        | <b>PROFESSIONE DEI GENITORI, anche se attualmente non lavorano.</b> (Per favore specifica il tipo di professione-per esempio, meccanico, insegnante di scuola superiore, casalinga, operaio, tornitore, venditore di calzature, sergente dell'esercito.)<br><br>PADRE: Professione _____<br>MADRE: Professione _____ |
| IL TUO SESSO:<br><input type="checkbox"/> M <input type="checkbox"/> F | LA TUA ETÀ: | GRUPPO ETNICO O RAZZA:                                 |                                                                                                                                                                                                                                                                                                                      |
| DATA ODIERNA:                                                          |             | LA TUA DATA DI NASCITA:                                |                                                                                                                                                                                                                                                                                                                      |
| CLASSE FREQUENTATA<br>_____                                            |             | Se stai lavorando per favore indica il tipo di lavoro: |                                                                                                                                                                                                                                                                                                                      |
| NON FREQUENTO LA SCUOLA <input type="checkbox"/>                       |             |                                                        | Per favore compila questo questionario che deve riflettere il tuo punto di vista anche se altre persone potrebbero non essere d'accordo. Sentiti libero di esprimere commenti aggiuntivi accanto ad ogni voce e nello spazio previsto a pag. 3 e 6.<br><b>Accertati di rispondere a tutte le domande.</b>            |

### I. Per favore elenca gli sport che ami maggiormente praticare.

Per esempio: nuoto, baseball, pallacanestro, pattinaggio, ciclismo, pesca ecc.

☐ Nessuno

a. \_\_\_\_\_  
b. \_\_\_\_\_  
c. \_\_\_\_\_

### Rispetto agli altri ragazzi della tua età quanto tempo trascorri in ognuno degli sport elencati?

| Meno degli altri         | Come gli altri           | Più degli altri          |
|--------------------------|--------------------------|--------------------------|
| <input type="checkbox"/> | <input type="checkbox"/> | <input type="checkbox"/> |
| <input type="checkbox"/> | <input type="checkbox"/> | <input type="checkbox"/> |
| <input type="checkbox"/> | <input type="checkbox"/> | <input type="checkbox"/> |

### Rispetto agli altri ragazzi della tua età come pratici ciascuno di questi sport?

| Meno degli altri         | Come gli altri           | Più degli altri          |
|--------------------------|--------------------------|--------------------------|
| <input type="checkbox"/> | <input type="checkbox"/> | <input type="checkbox"/> |
| <input type="checkbox"/> | <input type="checkbox"/> | <input type="checkbox"/> |
| <input type="checkbox"/> | <input type="checkbox"/> | <input type="checkbox"/> |

### II. Per favore elenca i tuoi hobby, attività, e giochi preferiti, oltre agli sport. Per esempio: carte, libri, pianoforte, macchine, computer, arte, etc. (Da non includere radio e TV)

☐ Nessuno

a. \_\_\_\_\_  
b. \_\_\_\_\_  
c. \_\_\_\_\_

### Rispetto agli altri ragazzi della tua età quanto tempo dedichi a ciascuna di queste attività?

| Meno degli altri         | Come gli altri           | Più degli altri          |
|--------------------------|--------------------------|--------------------------|
| <input type="checkbox"/> | <input type="checkbox"/> | <input type="checkbox"/> |
| <input type="checkbox"/> | <input type="checkbox"/> | <input type="checkbox"/> |
| <input type="checkbox"/> | <input type="checkbox"/> | <input type="checkbox"/> |

### Rispetto agli altri ragazzi della tua età quanto bene svolgi ciascuna di queste attività?

| Peggio degli altri       | Come gli altri           | Meglio degli altri       |
|--------------------------|--------------------------|--------------------------|
| <input type="checkbox"/> | <input type="checkbox"/> | <input type="checkbox"/> |
| <input type="checkbox"/> | <input type="checkbox"/> | <input type="checkbox"/> |
| <input type="checkbox"/> | <input type="checkbox"/> | <input type="checkbox"/> |

**DOPO ESSERTI ASSICURATO DI AVERE RISPOSTO A TUTTE LE DOMANDE VAI ALLA PAGINA SUCCESSIVA**

Youth Self-Report for Ages 11-18 Copyright 2001 T.Achenbach, ASEBA, University of Vermont (USA)

Questionario sul Comportamento del Giovane (11-18 anni ). Riproduzione autorizzata. Versione italiana curata da A. Frigerio (Istituto Scientifico "E.Medea" Ass. La Nostra Famiglia, Bosisio Parini (LC)). Traduzioni A. Frigerio (Istituto Scientifico "E.Medea" Ass. La Nostra Famiglia, Bosisio Parini (LC)); F. Giannotti e F. Cortesi (Università "La Sapienza" di Roma); A. Milone (Istituto Scientifico Stella Maris, Calambrone (Pi))© 20001

**III. Per favore elenca qualsiasi organizzazione, club, squadra o gruppo a cui appartieni**

**Rispetto agli altri ragazzi della tua età quanto sei attivo in ciascuna di queste?**

☐ Nessuno

| Meno attivo degli altri  | Attivo come gli altri    | Più attivo degli altri   |
|--------------------------|--------------------------|--------------------------|
| <input type="checkbox"/> | <input type="checkbox"/> | <input type="checkbox"/> |
| <input type="checkbox"/> | <input type="checkbox"/> | <input type="checkbox"/> |
| <input type="checkbox"/> | <input type="checkbox"/> | <input type="checkbox"/> |

a. \_\_\_\_\_

b. \_\_\_\_\_

c. \_\_\_\_\_

**IV. Per favore elenca qualsiasi lavoro o lavoretto che fai.** Per esempio, fare il/la babysitter, rifare il letto, lavorare in un negozio, etc. (inclusi i lavori remunerati e non remunerati).

**Rispetto agli altri ragazzi della tua età come svolgi queste attività?**

☐ Nessuno

| Peggio degli altri       | Come gli altri           | Meglio degli altri       |
|--------------------------|--------------------------|--------------------------|
| <input type="checkbox"/> | <input type="checkbox"/> | <input type="checkbox"/> |
| <input type="checkbox"/> | <input type="checkbox"/> | <input type="checkbox"/> |
| <input type="checkbox"/> | <input type="checkbox"/> | <input type="checkbox"/> |

a. \_\_\_\_\_

b. \_\_\_\_\_

c. \_\_\_\_\_

**V. 1. Più o meno, quanti amici intimi hai?**  
(non includere fratelli e sorelle)

☐ Nessuno

☐ 1

☐ 2 o 3

☐ 4 o più

**2. Più o meno, quante volte alla settimana fai delle cose con gli amici al di fuori degli orari scolastici?**  
(non includere fratelli e sorelle)

☐ Meno di una

☐ 1 o 2

☐ 3 o più

**VI. Rispetto agli altri ragazzi della tua età, in che modo:**

| Peggio degli altri | Come gli altri | Meglio degli altri |
|--------------------|----------------|--------------------|
|--------------------|----------------|--------------------|

a. Vai d'accordo con i tuoi fratelli e sorelle? ☐

☐

☐

☐ Io non ho fratelli o sorelle

b. Vai d'accordo con gli altri ragazzi? ☐

☐

☐

c. Vai d'accordo con i tuoi genitori? ☐

☐

☐

d. Fai delle cose da solo? ☐

☐

☐

**VII. Attuale rendimento scolastico**

☐ Non vado a scuola perché: \_\_\_\_\_  
\_\_\_\_\_

*Fai una crocetta per ogni voce*

|                                                                                                                                                                 | Fallimento/<br>Insuccesso | Al di sotto<br>della media | Intorno alla<br>media    | Sopra la media           |
|-----------------------------------------------------------------------------------------------------------------------------------------------------------------|---------------------------|----------------------------|--------------------------|--------------------------|
| a. Lettura, scrittura,<br>grammatica o letteratura<br>italiana                                                                                                  | <input type="checkbox"/>  | <input type="checkbox"/>   | <input type="checkbox"/> | <input type="checkbox"/> |
| b. Storia o Studi Sociali                                                                                                                                       | <input type="checkbox"/>  | <input type="checkbox"/>   | <input type="checkbox"/> | <input type="checkbox"/> |
| c. Aritmetica o Matematica                                                                                                                                      | <input type="checkbox"/>  | <input type="checkbox"/>   | <input type="checkbox"/> | <input type="checkbox"/> |
| d. Scienze                                                                                                                                                      | <input type="checkbox"/>  | <input type="checkbox"/>   | <input type="checkbox"/> | <input type="checkbox"/> |
| Altre materie scolastiche per<br>esempio: geografia, lingue<br>straniere, informatica (non<br>includere Educazione Fisica, o<br>altre materie non scolastiche). |                           |                            |                          |                          |
| e. _____                                                                                                                                                        | <input type="checkbox"/>  | <input type="checkbox"/>   | <input type="checkbox"/> | <input type="checkbox"/> |
| f. _____                                                                                                                                                        | <input type="checkbox"/>  | <input type="checkbox"/>   | <input type="checkbox"/> | <input type="checkbox"/> |
| g. _____                                                                                                                                                        | <input type="checkbox"/>  | <input type="checkbox"/>   | <input type="checkbox"/> | <input type="checkbox"/> |

**Hai qualche malattia, disabilità o handicap?**

☐ No

☐ Sì per favore descrivere:

**Per favore descrivi qualsiasi preoccupazione o problema che hai riguardo la scuola:**

**Per favore descrivi qualsiasi altra preoccupazione che hai:**

**Per favore descrivi le cose migliori che ti riguardano:**

Di seguito è riportato un elenco di affermazioni che descrivono i ragazzi. Per ogni voce che ti descrive allo **stato attuale o negli ultimi sei mesi**, sei pregato di fare una crocetta: sul due (2) se l'affermazione è **molto vera, o per lo più vera**; sull'uno (1) se l'affermazione è **in parte o qualche volta vera**; sullo zero (0) se l'affermazione **non è vera**.

| 0= Non vero |   |   | 1= In parte o qualche volta vero                                             |   |   | 2 = Molto vero o spesso vero |                                                                                                |  |
|-------------|---|---|------------------------------------------------------------------------------|---|---|------------------------------|------------------------------------------------------------------------------------------------|--|
| 0           | 1 | 2 | 1. Agisco in modo infantile per la mia età                                   | 0 | 1 | 2                            | 28. Infrango le regole a casa, a scuola, o altrove                                             |  |
| 0           | 1 | 2 | 2. Bevo alcolici senza l'approvazione dei miei genitori (descrivere): _____  | 0 | 1 | 2                            | 29. Ho paura di certi animali, situazioni o posti al di fuori della scuola (descrivere): _____ |  |
| 0           | 1 | 2 | 3. Discuto in modo polemico                                                  | 0 | 1 | 2                            | 30. Ho paura di andare a scuola                                                                |  |
| 0           | 1 | 2 | 4. Non porto a termine le cose che comincio                                  | 0 | 1 | 2                            | 31. Ho paura di poter pensare o fare qualcosa di male                                          |  |
| 0           | 1 | 2 | 5. Ci sono veramente poche cose che mi divertono.                            | 0 | 1 | 2                            | 32. Sento di dover essere perfetto                                                             |  |
| 0           | 1 | 2 | 6. Amo gli animali                                                           | 0 | 1 | 2                            | 33. Sento che nessuno mi ama                                                                   |  |
| 0           | 1 | 2 | 7. Mi vanto                                                                  | 0 | 1 | 2                            | 34. Mi sento perseguitato dagli altri                                                          |  |
| 0           | 1 | 2 | 8. Non riesco a concentrarmi o a mantenere l'attenzione a lungo              | 0 | 1 | 2                            | 35. Mi sento privo di valore o inferiore                                                       |  |
| 0           | 1 | 2 | 9. Non riesco a evitare certi pensieri (descrivere): _____                   | 0 | 1 | 2                            | 36. Accidentalmente mi faccio spesso male                                                      |  |
| 0           | 1 | 2 | 10. Non riesco a stare seduto tranquillo                                     | 0 | 1 | 2                            | 37. Sono coinvolto spesso in zuffe e liti                                                      |  |
| 0           | 1 | 2 | 11. Dipendo troppo dagli adulti                                              | 0 | 1 | 2                            | 38. Vengo spesso preso in giro dagli altri                                                     |  |
| 0           | 1 | 2 | 12. Mi sento solo                                                            | 0 | 1 | 2                            | 39. Frequento cattive compagnie                                                                |  |
| 0           | 1 | 2 | 13. Mi sento confuso o con la testa nel pallone                              | 0 | 1 | 2                            | 40. Sento suoni o voci che altre persone pensano non ci siano (descrivere): _____              |  |
| 0           | 1 | 2 | 14. Piango molto                                                             | 0 | 1 | 2                            | 41. Agisco senza fermarmi a pensare                                                            |  |
| 0           | 1 | 2 | 15. Sono molto onesto                                                        | 0 | 1 | 2                            | 42. Preferisco stare da solo piuttosto che con gli altri                                       |  |
| 0           | 1 | 2 | 16. Sono malvagio con gli altri                                              | 0 | 1 | 2                            | 43. Sono bugiardo o imbrogliatore                                                              |  |
| 0           | 1 | 2 | 17. Sogno molto ad occhi aperti                                              | 0 | 1 | 2                            | 44. Mi mangio le unghie                                                                        |  |
| 0           | 1 | 2 | 18. Intenzionalmente mi faccio del male o ho tentato il suicidio             | 0 | 1 | 2                            | 45. Sono nervoso o teso                                                                        |  |
| 0           | 1 | 2 | 19. Cerco di ottenere molta attenzione                                       | 0 | 1 | 2                            | 46. Movimenti nervosi o tic (descrivere): _____                                                |  |
| 0           | 1 | 2 | 20. Distruggo le mie cose                                                    | 0 | 1 | 2                            | 47. Ho incubi                                                                                  |  |
| 0           | 1 | 2 | 21. Distruggo cose che appartengono agli altri                               | 0 | 1 | 2                            | 48. Non piaccio agli altri ragazzi                                                             |  |
| 0           | 1 | 2 | 22. Disobbedisco ai miei genitori                                            | 0 | 1 | 2                            | 49. Posso fare certe cose meglio della maggior parte degli altri ragazzi                       |  |
| 0           | 1 | 2 | 23. Disobbedisco a scuola                                                    | 0 | 1 | 2                            | 50. Sono troppo timoroso o ansioso                                                             |  |
| 0           | 1 | 2 | 24. Non mangio come dovrei                                                   | 0 | 1 | 2                            | 51. Soffro di vertigini o di stordimenti                                                       |  |
| 0           | 1 | 2 | 25. Non vado d'accordo con gli altri ragazzi                                 | 0 | 1 | 2                            | 52. Mi sento troppo colpevole                                                                  |  |
| 0           | 1 | 2 | 26. Non mi sento in colpa dopo aver fatto qualcosa che non avrei dovuto fare | 0 | 1 | 2                            | 53. Mangio troppo                                                                              |  |
| 0           | 1 | 2 | 27. Sono geloso degli altri                                                  | 0 | 1 | 2                            | 54. Mi sento esageratamente stanco senza una buona ragione                                     |  |

DOPO ESSERTI ASSICURATO DI AVERE RISPOSTO A TUTTE LE DOMANDE VAI ALLA PAGINA SUCCESSIVA

0= Non vero (per ciò che ne sai)

1= In parte o qualche volta vero

2 = Molto vero o spesso vero

- 0 1 2 55 Sono in soprappeso
- 56 Problemi fisici **senza cause mediche conosciute**
- 0 1 2 a Dolori (non includere mal di stomaco e mal di testa)
- 0 1 2 b Mal di testa
- 0 1 2 c Nausea, malessere
- 0 1 2 d Problemi agli occhi (non includere se superati con lenti correttive) (descrivere): \_\_\_\_\_
- 0 1 2 e Eruzione cutanea o altri problemi di pelle
- 0 1 2 f Dolori di stomaco
- 0 1 2 g Vomito, conati
- 0 1 2 h Altro (descrivere): \_\_\_\_\_
- 0 1 2 57 Assalgo fisicamente le persone
- 0 1 2 58 Mi stuzzico la pelle o altre parti del corpo (descrivere): \_\_\_\_\_
- 0 1 2 59 Posso essere molto amichevole
- 0 1 2 60 Mi piace provare cose nuove
- 0 1 2 61 Il mio rendimento scolastico è scarso
- 0 1 2 62 Sono poco coordinato o impacciato nei movimenti
- 0 1 2 63 Preferisco stare con ragazzi più grandi che con ragazzi della mia età
- 0 1 2 64 Preferisco stare con ragazzi più piccoli che con ragazzi della mia età
- 0 1 2 65 Mi rifiuto di parlare
- 0 1 2 66 Ripeto certe azioni di continuo (descrivere): \_\_\_\_\_
- 0 1 2 67 Scappo via da casa
- 0 1 2 68 Strillo molto
- 0 1 2 69 Sono riservato, tengo le cose per me
- 0 1 2 70 Vedo cose che altre persone pensano non ci siano (descrivere): \_\_\_\_\_
- 0 1 2 71 Sono ipersensibile o mi imbarazzo facilmente
- 0 1 2 72 Appicco fuochi
- 0 1 2 73 Sono abile nei lavori manuali

- 0 1 2 74 Mi metto in mostra o faccio il pagliaccio
- 0 1 2 75 Sono troppo riservato o timido
- 0 1 2 76 Dormo di meno della maggior parte dei ragazzi
- 0 1 2 77 Dormo di più della maggior parte dei ragazzi durante il giorno e/o la notte(descrivere): \_\_\_\_\_
- 0 1 2 78 Sono disattento o facilmente distraibile
- 0 1 2 79 Ho problemi nel parlare (descrivere): \_\_\_\_\_
- 0 1 2 80 Lotto per i miei diritti
- 0 1 2 81 Rubo in casa
- 0 1 2 82 Rubo fuori di casa
- 0 1 2 83 Accumulo moltissime cose che non mi servono (descrivere): \_\_\_\_\_
- 0 1 2 84 Faccio cose che altre persone pensano siano strane (descrivere): \_\_\_\_\_
- 0 1 2 85 Ho pensieri che altre persone riterrebbero strani (descrivere): \_\_\_\_\_
- 0 1 2 86 Sono testardo
- 0 1 2 87 Ho repentini cambiamenti di umore o di stati d'animo
- 0 1 2 88 Mi piace stare con altre persone
- 0 1 2 89 Sono sospettoso
- 0 1 2 90 Bestemmio o uso un linguaggio osceno
- 0 1 2 91 Penso di uccidermi
- 0 1 2 92 Mi piace far ridere gli altri
- 0 1 2 93 Parlo troppo
- 0 1 2 94 Prendo molto in giro gli altri
- 0 1 2 95 Sono irascibile
- 0 1 2 96 Penso al sesso eccessivamente
- 0 1 2 97 Minaccio la gente
- 0 1 2 98 Mi piace aiutare gli altri
- 0 1 2 99 Fumo, mastico o sniffo tabacco
- 0 1 2 100 Ho disturbi del sonno (descrivere): \_\_\_\_\_
- 0 1 2 101 Marino la scuola o salto delle lezioni
- 0 1 2 102 Non ho molte energie

---

Per favore compila. Accertati di rispondere a tutte le domande.

---

0= Non vero (per ciò che ne sai)

1= In parte o qualche volta vero

2 = Molto vero o spesso vero

0 1 2 103 Sono scontento, triste, o depresso

0 1 2 104 Sono più rumoroso degli altri ragazzi

0 1 2 105 Faccio uso di droga (**non** includere alcool o tabacco) (descrivere):\_\_\_\_

0 1 2 106 Mi piace essere corretto con gli altri

0 1 2 107 Mi piacciono gli scherzi

0 1 2 108 Mi piace prendere la vita così come viene

0 1 2 109 Cerco di aiutare gli altri quando posso

0 1 2 110 Desidero essere del sesso opposto

0 1 2 111 Chiuso in me stesso, non socializzo con gli altri

0 1 2 112 Mi preoccupa molto

---

Per favore scrivi qualsiasi altra cosa che descrive i tuoi sentimenti, comportamenti o interessi

---

ASSICURATI DI AVER RISPOSTO A TUTTE LE DOMANDE.

---

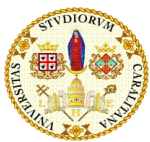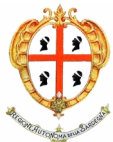

**AZIENDA OSPEDALIERO UNIVERSITARIA DI CAGLIARI**  
**Clinica di Neuropsichiatria Infantile**

Direttore: Prof. Alessandro Zuddas

*Centro Terapie Farmacologiche in  
NeuroPsichiatria dell'Infanzia e dell'Adolescenza*  
Responsabile: Prof. Alessandro Zuddas

**SOCIAL RESPONSIVENESS SCALE**  
**QUESTIONARIO PER I GENITORI**

*John N. Constantino, M.D.*

|                                                                        |            |                                      |
|------------------------------------------------------------------------|------------|--------------------------------------|
| Nome del soggetto: _____                                               |            | Sesso: M    F                        |
| Data di nascita: ____/____/____                                        | Età: _____ | Classe: _____                        |
| Informazioni ottenute da: <u>Madre</u> <u>Padre</u> <u>Altro</u> _____ |            | Data di compilazione: ____/____/____ |

**Istruzioni:** Per piacere rispondete, per ogni affermazione, barrando la casella che meglio descrive il comportamento del bambino negli ultimi sei mesi..

|                                                                                                                                                           | Non<br>vero              | Qualche<br>volta<br>vero | Spesso<br>vero           | Quasi<br>sempre<br>vero  |
|-----------------------------------------------------------------------------------------------------------------------------------------------------------|--------------------------|--------------------------|--------------------------|--------------------------|
| 1. Sembra più irrequieto in situazioni sociali rispetto a quando è solo                                                                                   | <input type="checkbox"/> | <input type="checkbox"/> | <input type="checkbox"/> | <input type="checkbox"/> |
| 2. Le espressioni del suo volto non sono congrue con quello dice                                                                                          | <input type="checkbox"/> | <input type="checkbox"/> | <input type="checkbox"/> | <input type="checkbox"/> |
| 3. Sembra sicuro di sé quando interagisce con gli altri                                                                                                   | <input type="checkbox"/> | <input type="checkbox"/> | <input type="checkbox"/> | <input type="checkbox"/> |
| 4. Quando è sotto stress il bambino sembra comportarsi in modo meccanico (per esempio, mostra comportamenti rigidi ed inflessibili che appaiono bizzarri) | <input type="checkbox"/> | <input type="checkbox"/> | <input type="checkbox"/> | <input type="checkbox"/> |
| 5. Non si accorge quando gli altri provano ad "approfittarsi" di lui                                                                                      | <input type="checkbox"/> | <input type="checkbox"/> | <input type="checkbox"/> | <input type="checkbox"/> |
| 6. Preferisce stare da solo piuttosto che con altri                                                                                                       | <input type="checkbox"/> | <input type="checkbox"/> | <input type="checkbox"/> | <input type="checkbox"/> |
| 7. Si rende conto di ciò che gli altri pensano o sentono                                                                                                  | <input type="checkbox"/> | <input type="checkbox"/> | <input type="checkbox"/> | <input type="checkbox"/> |
| 8. Si comporta in modo tale da sembrare strano o bizzarro                                                                                                 | <input type="checkbox"/> | <input type="checkbox"/> | <input type="checkbox"/> | <input type="checkbox"/> |
| 9. Deve stare sempre vicino agli adulti, sembra troppo dipendente da loro                                                                                 | <input type="checkbox"/> | <input type="checkbox"/> | <input type="checkbox"/> | <input type="checkbox"/> |
| 10. Prende le cose troppo alla lettera e non coglie il reale significato della conversazione                                                              | <input type="checkbox"/> | <input type="checkbox"/> | <input type="checkbox"/> | <input type="checkbox"/> |
| 11. E' abbastanza sicuro di se stesso                                                                                                                     | <input type="checkbox"/> | <input type="checkbox"/> | <input type="checkbox"/> | <input type="checkbox"/> |
| 12. E' capace di comunicare i suoi sentimenti agli altri                                                                                                  | <input type="checkbox"/> | <input type="checkbox"/> | <input type="checkbox"/> | <input type="checkbox"/> |
| 13. Ha difficoltà nelle interazioni con gli altri che prevedono uno scambio di turni (per esempio, non sembra capire i turni in una conversazione)        | <input type="checkbox"/> | <input type="checkbox"/> | <input type="checkbox"/> | <input type="checkbox"/> |
| 14. Non è ben coordinato nell'attività fisica                                                                                                             | <input type="checkbox"/> | <input type="checkbox"/> | <input type="checkbox"/> | <input type="checkbox"/> |

|                                                                                                                                                       | Non<br>vero              | Qualche<br>volta<br>vero | Spesso<br>vero           | Quasi<br>sempre<br>vero  |
|-------------------------------------------------------------------------------------------------------------------------------------------------------|--------------------------|--------------------------|--------------------------|--------------------------|
| 15. E' capace di capire gli stati d'animo delle altre persone dal tono di voce e dalle espressioni facciali                                           | <input type="checkbox"/> | <input type="checkbox"/> | <input type="checkbox"/> | <input type="checkbox"/> |
| 16. Evita il contatto oculare o ha un contatto oculare inusuale                                                                                       | <input type="checkbox"/> | <input type="checkbox"/> | <input type="checkbox"/> | <input type="checkbox"/> |
| 17. Riconosce quando qualcuno si comporta in modo disonesto                                                                                           | <input type="checkbox"/> | <input type="checkbox"/> | <input type="checkbox"/> | <input type="checkbox"/> |
| 18. Ha difficoltà a stringere amicizie anche quando ci mette tutto il suo impegno                                                                     | <input type="checkbox"/> | <input type="checkbox"/> | <input type="checkbox"/> | <input type="checkbox"/> |
| 19. Diviene frustrato quando non riesce a comunicare le sue idee                                                                                      | <input type="checkbox"/> | <input type="checkbox"/> | <input type="checkbox"/> | <input type="checkbox"/> |
| 20. Mostra interessi sensoriali insoliti (come portare gli oggetti alla bocca o far ruotare gli oggetti) o strani modi di utilizzare i giocattoli     | <input type="checkbox"/> | <input type="checkbox"/> | <input type="checkbox"/> | <input type="checkbox"/> |
| 21. E' capace di imitare le azioni degli altri                                                                                                        | <input type="checkbox"/> | <input type="checkbox"/> | <input type="checkbox"/> | <input type="checkbox"/> |
| 22. Gioca in modo appropriato con i bambini della sua età                                                                                             | <input type="checkbox"/> | <input type="checkbox"/> | <input type="checkbox"/> | <input type="checkbox"/> |
| 23. Non partecipa ad attività di gruppo spontaneamente (a meno che non glielo si dica)                                                                | <input type="checkbox"/> | <input type="checkbox"/> | <input type="checkbox"/> | <input type="checkbox"/> |
| 24. Ha più difficoltà rispetto agli altri bambini nei cambiamenti della sua routine                                                                   | <input type="checkbox"/> | <input type="checkbox"/> | <input type="checkbox"/> | <input type="checkbox"/> |
| 25. Sembra non importargli/le di "stare al passo" o di non "essere sulla stessa lunghezza d'onda" degli altri                                         | <input type="checkbox"/> | <input type="checkbox"/> | <input type="checkbox"/> | <input type="checkbox"/> |
| 26. Offre conforto agli altri quando sono tristi                                                                                                      | <input type="checkbox"/> | <input type="checkbox"/> | <input type="checkbox"/> | <input type="checkbox"/> |
| 27. Evita di iniziare interazioni sociali con i coetanei o con gli adulti                                                                             | <input type="checkbox"/> | <input type="checkbox"/> | <input type="checkbox"/> | <input type="checkbox"/> |
| 28. Pensa o dice la stessa cosa più e più volte                                                                                                       | <input type="checkbox"/> | <input type="checkbox"/> | <input type="checkbox"/> | <input type="checkbox"/> |
| 29. E' considerato dagli altri bambini strano o bizzarro                                                                                              | <input type="checkbox"/> | <input type="checkbox"/> | <input type="checkbox"/> | <input type="checkbox"/> |
| 30. Si irrita in situazioni in cui accadono troppe cose (situazioni movimentate)                                                                      | <input type="checkbox"/> | <input type="checkbox"/> | <input type="checkbox"/> | <input type="checkbox"/> |
| 31. Non riesce a distogliere l'attenzione da una cosa una volta che ha iniziato a pensarci                                                            | <input type="checkbox"/> | <input type="checkbox"/> | <input type="checkbox"/> | <input type="checkbox"/> |
| 32. Ha una buona igiene personale                                                                                                                     | <input type="checkbox"/> | <input type="checkbox"/> | <input type="checkbox"/> | <input type="checkbox"/> |
| 33. E' goffo nei rapporti sociali, anche quando cerca di essere cortese                                                                               | <input type="checkbox"/> | <input type="checkbox"/> | <input type="checkbox"/> | <input type="checkbox"/> |
| 34. Evita le persone che vogliono essergli emotivamente vicine                                                                                        | <input type="checkbox"/> | <input type="checkbox"/> | <input type="checkbox"/> | <input type="checkbox"/> |
| 35. Ha difficoltà nel sostenere il flusso di una normale conversazione (scambi turni)                                                                 | <input type="checkbox"/> | <input type="checkbox"/> | <input type="checkbox"/> | <input type="checkbox"/> |
| 36. Ha difficoltà nel "relazionarsi" con adulti                                                                                                       | <input type="checkbox"/> | <input type="checkbox"/> | <input type="checkbox"/> | <input type="checkbox"/> |
| 37. Ha difficoltà nel "relazionarsi" con i coetanei                                                                                                   | <input type="checkbox"/> | <input type="checkbox"/> | <input type="checkbox"/> | <input type="checkbox"/> |
| 38. Risponde appropriatamente ai cambiamenti di umore negli altri (per es. quando l'umore di un amico o compagno di giochi cambia da felice a triste) | <input type="checkbox"/> | <input type="checkbox"/> | <input type="checkbox"/> | <input type="checkbox"/> |
| 39. Ha una gamma d'interessi ristretta o insolitamente limitata                                                                                       | <input type="checkbox"/> | <input type="checkbox"/> | <input type="checkbox"/> | <input type="checkbox"/> |

|                                                                                                                                                                                                                                                            | Non<br>vero              | Qualche<br>volta<br>vero | Spesso<br>vero           | Quasi<br>sempre<br>vero  |
|------------------------------------------------------------------------------------------------------------------------------------------------------------------------------------------------------------------------------------------------------------|--------------------------|--------------------------|--------------------------|--------------------------|
| 40. Ha una buona immaginazione, è bravo nel “far finta” (senza perdere il contatto con la realtà)                                                                                                                                                          | <input type="checkbox"/> | <input type="checkbox"/> | <input type="checkbox"/> | <input type="checkbox"/> |
| 41. Passa da un’attività all’altra senza una finalità precisa                                                                                                                                                                                              | <input type="checkbox"/> | <input type="checkbox"/> | <input type="checkbox"/> | <input type="checkbox"/> |
| 42. Si mostra esageratamente sensibile a suoni, stimoli tattili o odori                                                                                                                                                                                    | <input type="checkbox"/> | <input type="checkbox"/> | <input type="checkbox"/> | <input type="checkbox"/> |
| 43. Si distacca facilmente dai genitori                                                                                                                                                                                                                    | <input type="checkbox"/> | <input type="checkbox"/> | <input type="checkbox"/> | <input type="checkbox"/> |
| 44. Non capisce come un evento sia correlato ad un altro, allo stesso modo di come lo capiscono i suoi coetanei (per es. ha problemi nel capire i rapporti di causa ed effetto)                                                                            | <input type="checkbox"/> | <input type="checkbox"/> | <input type="checkbox"/> | <input type="checkbox"/> |
| 45. Rivolge la sua attenzione verso dove gli altri stanno guardando o ascoltando                                                                                                                                                                           | <input type="checkbox"/> | <input type="checkbox"/> | <input type="checkbox"/> | <input type="checkbox"/> |
| 46. Mostra frequentemente espressioni facciali troppo serie                                                                                                                                                                                                | <input type="checkbox"/> | <input type="checkbox"/> | <input type="checkbox"/> | <input type="checkbox"/> |
| 47. Ha comportamenti sciocchi o ride inappropriatamente                                                                                                                                                                                                    | <input type="checkbox"/> | <input type="checkbox"/> | <input type="checkbox"/> | <input type="checkbox"/> |
| 48. Possiede il senso dell’umorismo, capisce gli scherzi                                                                                                                                                                                                   | <input type="checkbox"/> | <input type="checkbox"/> | <input type="checkbox"/> | <input type="checkbox"/> |
| 49. E’ estremamente abile in alcune attività, ma non altrettanto in molte altre                                                                                                                                                                            | <input type="checkbox"/> | <input type="checkbox"/> | <input type="checkbox"/> | <input type="checkbox"/> |
| 50. Mette in atto dei comportamenti ripetitivi o compulsivi (es. sfarfallio delle mani o dondolio)                                                                                                                                                         | <input type="checkbox"/> | <input type="checkbox"/> | <input type="checkbox"/> | <input type="checkbox"/> |
| 51. Ha difficoltà a rispondere alle domande direttamente e finisce per girare intorno all’argomento                                                                                                                                                        | <input type="checkbox"/> | <input type="checkbox"/> | <input type="checkbox"/> | <input type="checkbox"/> |
| 52. Si accorge quando parla a voce troppo alta o diventa troppo chiassoso                                                                                                                                                                                  | <input type="checkbox"/> | <input type="checkbox"/> | <input type="checkbox"/> | <input type="checkbox"/> |
| 53. Parla con le persone con un tono di voce inusuale (parla come un robot o come se stesse “tenendo una conferenza”)                                                                                                                                      | <input type="checkbox"/> | <input type="checkbox"/> | <input type="checkbox"/> | <input type="checkbox"/> |
| 54. Sembra trattare gli altri come se fossero degli oggetti                                                                                                                                                                                                | <input type="checkbox"/> | <input type="checkbox"/> | <input type="checkbox"/> | <input type="checkbox"/> |
| 55. Si accorge quando si avvicina troppo ad una persona e invade il suo spazio personale                                                                                                                                                                   | <input type="checkbox"/> | <input type="checkbox"/> | <input type="checkbox"/> | <input type="checkbox"/> |
| 56. Si intromette tra due persone mentre parlano                                                                                                                                                                                                           | <input type="checkbox"/> | <input type="checkbox"/> | <input type="checkbox"/> | <input type="checkbox"/> |
| 57. Viene spesso preso in giro                                                                                                                                                                                                                             | <input type="checkbox"/> | <input type="checkbox"/> | <input type="checkbox"/> | <input type="checkbox"/> |
| 58. Sembra essere maggiormente interessato dai particolari delle cose piuttosto che dalla “intera figura” (per es. se gli chiedete di descrivere cosa succede in una storia, il bambino/a può parlare solo del tipo di vestiti che i personaggi indossano) | <input type="checkbox"/> | <input type="checkbox"/> | <input type="checkbox"/> | <input type="checkbox"/> |
| 59. E’ molto diffidente                                                                                                                                                                                                                                    | <input type="checkbox"/> | <input type="checkbox"/> | <input type="checkbox"/> | <input type="checkbox"/> |
| 60. È emotivamente distaccato, non mostra le sue emozioni                                                                                                                                                                                                  | <input type="checkbox"/> | <input type="checkbox"/> | <input type="checkbox"/> | <input type="checkbox"/> |
| 61. È inflessibile, gli è difficile cambiare idea/opinione                                                                                                                                                                                                 | <input type="checkbox"/> | <input type="checkbox"/> | <input type="checkbox"/> | <input type="checkbox"/> |
| 62. Fornisce delle motivazioni insolite o illogiche per giustificare le sue azioni                                                                                                                                                                         | <input type="checkbox"/> | <input type="checkbox"/> | <input type="checkbox"/> | <input type="checkbox"/> |

|                                                                                                                                                      | <b>Non<br/>vero</b>      | <b>Qualche<br/>volta<br/>vero</b> | <b>Spesso<br/>vero</b>   | <b>Quasi<br/>sempre<br/>vero</b> |
|------------------------------------------------------------------------------------------------------------------------------------------------------|--------------------------|-----------------------------------|--------------------------|----------------------------------|
| 63. Tocca gli altri in modo insolito (per esempio, il bambino può toccare qualcuno solo per avere un contatto e quindi andare via senza dire niente) | <input type="checkbox"/> | <input type="checkbox"/>          | <input type="checkbox"/> | <input type="checkbox"/>         |
| 64. È troppo teso nei contesti sociali                                                                                                               | <input type="checkbox"/> | <input type="checkbox"/>          | <input type="checkbox"/> | <input type="checkbox"/>         |
| 65. Si incanta e guarda nel vuoto                                                                                                                    | <input type="checkbox"/> | <input type="checkbox"/>          | <input type="checkbox"/> | <input type="checkbox"/>         |

C. Keith Connors

Adattamento italiano a cura di M. Nobile, B. Alberti e A. Zuddas

Nome del soggetto \_\_\_\_\_ Sesso: M ☐ F ☐  
 Data di nascita \_\_\_\_ / \_\_\_\_ / \_\_\_\_ Età \_\_\_\_ Classe \_\_\_\_ Nome del genitore \_\_\_\_\_ Data odierna \_\_\_\_ / \_\_\_\_ / \_\_\_\_  
giorno mese anno giorno mese anno

**ISTRUZIONI.** Di seguito viene riportata una serie di problemi comuni che bambini e adolescenti presentano. Rispondete a ogni affermazione a seconda del comportamento di vostro figlio nell'ultimo mese. Per ogni affermazione, chiedetevi "Quanto ha rappresentato un problema in quest'ultimo mese?" e fate un cerchietto attorno alla risposta che vi sembra più appropriata. Se quanto affermato non ha mai rappresentato un problema, o se lo è stato raramente o molto poco di frequente, fate un cerchietto attorno a 0. Se ha rappresentato un problema in misura notevole, o molto spesso o di frequente, fate un cerchietto attorno a 3. Fate un cerchietto attorno a 1 o 2 per le altre situazioni. Rispondete a tutte le affermazioni.

|                                                                                                                                                                                              | NON VERO<br>(mai, raramente) | IN PARTE VERO<br>(ogni tanto) | ABBASTANZA VERO<br>(spesso, di frequente) | MOLTO VERO<br>(molto spesso, molto frequente) |
|----------------------------------------------------------------------------------------------------------------------------------------------------------------------------------------------|------------------------------|-------------------------------|-------------------------------------------|-----------------------------------------------|
| 1. È poco attento/a, si distrae facilmente                                                                                                                                                   | 0                            | 1                             | 2                                         | 3                                             |
| 2. È arrabbiato/a e permaloso/a                                                                                                                                                              | 0                            | 1                             | 2                                         | 3                                             |
| 3. Ha difficoltà a svolgere o a completare i compiti di casa                                                                                                                                 | 0                            | 1                             | 2                                         | 3                                             |
| 4. È sempre in movimento o si comporta come se andasse "a motore"                                                                                                                            | 0                            | 1                             | 2                                         | 3                                             |
| 5. Ha un tempo di attenzione limitato                                                                                                                                                        | 0                            | 1                             | 2                                         | 3                                             |
| 6. Discute in modo polemico con gli adulti                                                                                                                                                   | 0                            | 1                             | 2                                         | 3                                             |
| 7. Giocherella con le mani o i piedi o si agita sulla sedia                                                                                                                                  | 0                            | 1                             | 2                                         | 3                                             |
| 8. Non riesce a portare a termine quanto gli/le viene assegnato                                                                                                                              | 0                            | 1                             | 2                                         | 3                                             |
| 9. È difficile da controllare nei centri commerciali o quando si va a fare la spesa                                                                                                          | 0                            | 1                             | 2                                         | 3                                             |
| 10. È disordinato/a o disorganizzato/a a casa o a scuola                                                                                                                                     | 0                            | 1                             | 2                                         | 3                                             |
| 11. Perde la pazienza                                                                                                                                                                        | 0                            | 1                             | 2                                         | 3                                             |
| 12. Ha bisogno che qualcuno lo/la segua attentamente per terminare quanto gli/le viene assegnato                                                                                             | 0                            | 1                             | 2                                         | 3                                             |
| 13. Si applica solo se qualcosa lo/la interessa veramente                                                                                                                                    | 0                            | 1                             | 2                                         | 3                                             |
| 14. Corre di qua e di là o si arrampica in situazioni in cui non dovrebbe                                                                                                                    | 0                            | 1                             | 2                                         | 3                                             |
| 15. È distratto/a o la capacità di mantenere l'attenzione costituisce un problema                                                                                                            | 0                            | 1                             | 2                                         | 3                                             |
| 16. È irritabile                                                                                                                                                                             | 0                            | 1                             | 2                                         | 3                                             |
| 17. Evita, è riluttante o ha difficoltà a impegnarsi in compiti che comportano uno sforzo mentale continuato (come i compiti a scuola o a casa)                                              | 0                            | 1                             | 2                                         | 3                                             |
| 18. È irrequieto/a nel senso che si agita                                                                                                                                                    | 0                            | 1                             | 2                                         | 3                                             |
| 19. Si distrae quando gli/le si impartiscono istruzioni su come fare qualcosa                                                                                                                | 0                            | 1                             | 2                                         | 3                                             |
| 20. Ha un atteggiamento di sfida nei confronti degli adulti o rifiuta di svolgere quanto richiesto                                                                                           | 0                            | 1                             | 2                                         | 3                                             |
| 21. Ha difficoltà a concentrarsi in classe                                                                                                                                                   | 0                            | 1                             | 2                                         | 3                                             |
| 22. Ha difficoltà ad aspettare in fila o ad attendere il proprio turno in giochi o attività di gruppo                                                                                        | 0                            | 1                             | 2                                         | 3                                             |
| 23. Si allontana dal posto in classe o in altre situazioni in cui dovrebbe restare seduto/a                                                                                                  | 0                            | 1                             | 2                                         | 3                                             |
| 24. Intenzionalmente fa cose che infastidiscono gli altri                                                                                                                                    | 0                            | 1                             | 2                                         | 3                                             |
| 25. Non segue le istruzioni e non termina i compiti o i lavoretti assegnati o le incombenze sul posto di lavoro (non per atteggiamento oppositivo o incapacità di comprendere le istruzioni) | 0                            | 1                             | 2                                         | 3                                             |
| 26. Ha difficoltà a giocare o ad impegnarsi in attività di gioco in modo tranquillo                                                                                                          | 0                            | 1                             | 2                                         | 3                                             |
| 27. Si sente facilmente frustrato/a nei suoi sforzi                                                                                                                                          | 0                            | 1                             | 2                                         | 3                                             |

**Attenzione.** Questo modulo è stampato in azzurro ed è formato da più fogli incollati fra di loro: ogni altra versione è contraffatta, NON LA UTILIZZI. La fotocopia è illegale, danneggia la ricerca e non garantisce il Suo diritto a svolgere un test valido ed attendibile.
